# Supplementary material
Source: PubMed Central journal article supplement (PMC4860026)
Supplement: NIHMS780613-supplement-Table_1.pdf [file NIHMS780613-supplement-Table_1.pdf]

# Martinez *et al.*, Supplemental Table 1

| <b>Components required for canonical autophagy and LAP</b> |                                                                                       |                  |
|------------------------------------------------------------|---------------------------------------------------------------------------------------|------------------|
| <i>Component</i>                                           | <i>Function/Complex</i>                                                               | <i>Reference</i> |
| Beclin1                                                    | Class III PI3K complex                                                                | 1, 2, 4, 6       |
| VPS34                                                      | Class III PI3K complex                                                                | 1, 2, 4, 6       |
| UVRAG                                                      | Class III PI3K complex, vesicle sorting                                               | 6                |
| ATG5                                                       | ATG5-12-16L complex formation, complex functions as E3 for LC3-II generation          | 1, 2, 4, 6       |
| ATG12                                                      | ATG5-12-16L complex formation, complex functions as E3 for LC3-II generation          | 6                |
| ATG16L                                                     | ATG5-12-16L complex formation, complex functions as E3 for LC3-II generation          | 6                |
| ATG7                                                       | ATG5-12-16L complex and LC3-PE formation (functions as E1)                            | 1-6              |
| ATG3                                                       | LC3-PE formation (function as E2)                                                     | 6                |
| ATG4                                                       | LC3 processing                                                                        | 6                |
| LC3 family (LC3A, LC3B, GATE16, GABARAP)                   | Maturation and fusion to lysosomal compartments                                       | 6                |
| <b>Components required for canonical autophagy only</b>    |                                                                                       |                  |
| <i>Component</i>                                           | <i>Function/Complex</i>                                                               | <i>Reference</i> |
| ULK1                                                       | Pre-initiation complex                                                                | 2-6              |
| FIP200                                                     | Pre-initiation complex                                                                | 4-6              |
| ATG13                                                      | Pre-initiation complex                                                                | 4-6              |
| Ambra1                                                     | Class III PI3K complex                                                                | 6                |
| WIPI2                                                      | Recruitment of ATG5-12-16L                                                            | 6                |
| ATG14                                                      | Class III PI3K complex                                                                | 6                |
| <b>Components required for LAP only</b>                    |                                                                                       |                  |
| <i>Component</i>                                           | <i>Function/Complex</i>                                                               | <i>Reference</i> |
| Rubicon                                                    | Localization and activity of Class III PI3K complex, stabilization of NOX2 complex    | 6                |
| NOX2                                                       | NADPH oxidase, ROS production, recruitment of ATG5-12-16L and LC3 conjugation systems | 6                |

1. Sanjuan, M. A. *et al.* Toll-like receptor signalling in macrophages links the autophagy pathway to phagocytosis. *Nature* 450, 1253-1257 (2007).

2. Martinez, J. *et al.* Microtubule-associated protein 1 light chain 3 alpha (LC3)-associated phagocytosis is required for the efficient clearance of dead cells. *Proceedings of the National Academy of Sciences of the United States of America* 108, 17396-17401, doi:10.1073/pnas.1113421108 (2011).

3. Florey, O., Kim, S. E., Sandoval, C. P., Haynes, C. M. & Overholtzer, M. Autophagy machinery mediates macroendocytic processing and entotic cell death by targeting single membranes. *Nat Cell Biol* 13, 1335-1343, doi:10.1038/ncb2363 (2011).

4. Henault, J. *et al.* Noncanonical autophagy is required for type I interferon secretion in response to DNA-immune complexes. *Immunity* 37, 986-997, doi:10.1016/j.immuni.2012.09.014 (2012).

5. Kim, J. Y. *et al.* Noncanonical autophagy promotes the visual cycle. *Cell* 154, 365-376, doi:10.1016/j.cell.2013.06.012 (2013).

6. Martinez, J. *et al.* Molecular characterization of LC3-associated phagocytosis (LAP) reveals distinct roles for Rubicon, NOX2, and autophagy proteins. *Nature cell biology*, 17, 893-906.
